1 **The social and spatial ecology of dengue presence and burden during an outbreak in**  
2 **Guayaquil, Ecuador, 2012**

3  
4 Catherine A. Lippi<sup>a</sup>, Anna M. Stewart-Ibarra<sup>b</sup>, Ángel G. Muñoz<sup>c</sup>, Mercy J. Borbor<sup>d</sup>, Raúl Mejía<sup>e</sup>,  
5 Keytia Rivero<sup>e</sup>, Katty Castillo<sup>f</sup>, Washington B. Cárdenas<sup>g</sup>, Sadie J. Ryan<sup>a\*</sup>

6  
7 <sup>a</sup> Emerging Pathogens Institute and Department of Geography, University of Florida, Gainesville,  
8 FL, USA

9 <sup>b</sup> Center for Global Health and Translational Science and Department of Medicine, State  
10 University of New York Upstate Medical University, Syracuse, NY, USA,

11 <sup>c</sup> Atmospheric and Oceanic Sciences (AOS), Princeton University. Princeton, NJ, USA;  
12 International Research Institute for Climate and Society (IRI), Earth Institute, Columbia  
13 University, New York, NY, USA

14 <sup>d</sup> Escuela Superior Politécnica del Litoral, Guayaquil, Ecuador<sup>¥</sup>

15 <sup>e</sup> National Institute of Meteorology and Hydrology, Guayaquil, Ecuador<sup>¥</sup>,

16 <sup>f</sup> Institute of Biometrics and Epidemiology, Auf'm Hennekamp 65, 40225 Düsseldorf, Germany

17 <sup>g</sup> Laboratorio de Biomedicina, FCV, Escuela Superior Politécnica del Litoral, Guayaquil, Ecuador

18

19 <sup>¥</sup>These institutes are part of the Latin American Observatory partnership

20 (<http://mediawiki.cmc.org.ve>)

21

22 **\*Corresponding Author:**

23 Dr. Sadie J. Ryan, PhD

24 Emerging Pathogens Institute and Department of Geography

25 University of Florida

26 Gainesville, FL 32610 USA

27 Tel.:1-352-392-0494

28 Email: [sjryan@ufl.edu](mailto:sjryan@ufl.edu)

29

30 CAL: [clippi@ufl.edu](mailto:clippi@ufl.edu)

31 AMSI: [stewart@upstate.edu](mailto:stewart@upstate.edu)

32 AM: [agms@princeton.edu](mailto:agms@princeton.edu)

33 SJR: [sjryan@ufl.edu](mailto:sjryan@ufl.edu)

34 MJB: [meborbor@espol.edu.ec](mailto:meborbor@espol.edu.ec)

35 RM: [rmejia@inamhi.gob.ec](mailto:rmejia@inamhi.gob.ec)

36 KR: [keytiar@gmail.com](mailto:keytiar@gmail.com)

37 KC: [Katty.Castillo@ddz.uni-duesseldorf.de](mailto:Katty.Castillo@ddz.uni-duesseldorf.de)

38 WBC: [wbcarden@espol.edu.ec](mailto:wbcarden@espol.edu.ec)

39

40

41 **Abstract**

42 **Background:** Dengue fever, a mosquito-borne viral disease, is an ongoing public health problem  
43 in Ecuador and throughout the tropics, yet we have a limited understanding of the disease  
44 transmission dynamics in these regions. The objective of this study was to characterize the  
45 spatial dynamics and social-ecological risk factors associated with a recent dengue outbreak in  
46 Guayaquil, Ecuador.

47 **Methods:** We examined georeferenced dengue cases ( $n = 4,248$ ) and block-level census data  
48 variables to identify potential social-ecological variables associated with the presence and burden  
49 of dengue fever in Guayaquil in 2012. We applied LISA and Moran's I tests to analyze hotspots  
50 of dengue cases and used multimodel selection in R computing language to identify covariates  
51 associated with dengue incidence at the census zone level.

52 **Results:** Significant hotspots of dengue transmission were found near the North Central and  
53 Southern portions of Guayaquil. Significant risk factors for presence of dengue included poor  
54 housing conditions (e.g., poor condition of ceiling, floors, and walls), access to paved roads, and  
55 receipt of remittances. Counterintuitive positive correlations with dengue presence were  
56 observed with several municipal services such as garbage collection and access to piped water.  
57 Risk factors for increased burden of dengue included poor housing conditions, garbage  
58 collection, receipt of remittances, and sharing a property with more than one household. Social  
59 factors such as education and household demographics were negatively correlated with increased  
60 dengue burden.

61 **Conclusions.** Findings elucidate underlying differences with dengue presence and burden and  
62 indicate the potential to develop dengue vulnerability and risk maps to inform disease prevention  
63 and control, information that is also relevant for emerging epidemics of chikungunya and zika.

64 **Keywords:** Dengue fever, geography, risk, climate, spatial, temporal, Ecuador

65

## 66 **Background**

67           The public health sector in Latin America is facing the alarming situation of concurrent  
68 epidemics of dengue fever, chikungunya, and zika, febrile viral diseases transmitted by the  
69 mosquito vectors *Aedes aegypti* and *Aedes albopictus* [1–4]. Traditional surveillance and vector  
70 control efforts have been unable to halt these epidemics [5]. Macro-level social-ecological  
71 factors have facilitated the global spread, co-evolution and persistence of the dengue viruses and  
72 vectors, including growing urban populations, global movement, climate variability, insecticide  
73 resistance, and resource-limited vector control programs. It is necessary to study effects of these  
74 drivers at the local level to understand the complex dynamics and drivers of disease  
75 transmission, which vary from region to region, thus allowing decision makers to more  
76 effectively intervene, predict, and respond to disease outbreaks [5].

77           Spatial epidemiological risk maps provide important information to target focal vector  
78 control efforts in high-risk areas, potentially increasing the effectiveness of public health  
79 interventions [6,7]. Typically, historical epidemiological records are digitized to understand the  
80 spatial distribution of the burden of disease and the presence/absence of disease. Layers of  
81 social-ecological predictors (e.g., land use maps, socioeconomic census data) are incorporated to  
82 test the hypothesis that one or more predictors are associated with the presence /absence or  
83 burden of disease. This information allows decision makers to identify geographic areas to focus  
84 interventions (e.g., hotspots) and risk factors to target in integrated vector-control interventions  
85 (e.g., community health interventions for specific vulnerable populations). Spatial risk maps can  
86 also be integrated into disease early warning systems (EWS) to generate disease risk forecasts,  
87 such as seasonal risk maps. [8–11]. Previous studies indicate that associations between social-

88 ecological risk factors and dengue transmission may vary by location and time, highlighting the  
89 need for local analyses of dengue risk [6,12–17].

90 Since 2000, DENV 1-4 have co-circulated in Ecuador, presenting the greatest burden of  
91 disease in the lowland tropical coastal region [18]. Guayaquil, Ecuador, the focus of this study, is  
92 the largest city in the country and the historical epicenter of dengue transmission in the country.  
93 The first cases of autochthonous chikungunya cases were reported in Ecuador at the end of 2014,  
94 resulting in a major epidemic in 2015, with over 33,000 cases reported. The first cases of zika  
95 were confirmed in Ecuador on January 7, 2016, and to date (25 Aug 2016) 2,076 suspected cases  
96 of zika have been reported by the Ministry of Health [3].

97 Climate is an important source of predictability for these diseases, mainly because both  
98 the viruses and the vectors are sensitive to temperature. For example, anomalously high surface  
99 temperatures produced by a combination of natural climate variability and climate change have  
100 been suggested to have played a role in the present zika epidemic [4].

101 The aim of this study was to characterize the spatial dynamics of cases and demographic  
102 risk factors associated with a recent dengue epidemic (2012) in the coastal city of Guayaquil,  
103 Ecuador. This study builds on prior studies in Machala, Ecuador, that demonstrated the role of  
104 social determinants in predicting dengue risk at the household and city-levels, and contributes to  
105 a broader effort to strengthen surveillance capacities in the region in partnership with the  
106 Ministry of Health and the National Institute of Meteorology and Hydrology (INAMHI) [16,17].  
107 This study is intended to both provide the much needed local-level social-ecological context, and  
108 to demonstrate the differences arising in inference from presence and burden of cases in these  
109 analyses.

110

## 111 **Methods**

### 112 **Study Area**

113 Dengue fever is hyper-endemic in Guayaquil, Guayas Province, a tropical coastal port city (pop.  
114 2,350,915) [19], as well as the largest city in Ecuador (Fig. 1). There is a pronounced seasonal  
115 peak in dengue transmission from February to May, which follows the onset of the hot rainy  
116 season (Fig. 2). In 2012 there were over 4,000 cases of dengue fever (and 79 DHF) reported in  
117 Guayas province, marking the biggest dengue outbreak to date [20]. In Guayaquil, there were  
118 4,248 clinically reported cases of dengue fever in 2012, or a disease incidence of 18.07 dengue  
119 cases per 10,000 population per year compared to an average incidence of 4.99 dengue cases per  
120 10,000 population per year for the period of 2000 to 2011 (Fig. 3) [22].

121

### 122 **Data Sources**

123 Epidemiological data (dengue case reports for 2012) and national census data (2010) were  
124 examined to identify potential social-ecological variables associated with the presence and  
125 burden of dengue fever during the 2012 outbreak in Guayaquil, Ecuador. Epidemiological data  
126 were provided by INAMHI through a collaborative project with the Ministry of Health that was  
127 sponsored by the Ecuadorian government [21]. No formal ethical review was required as the data  
128 used in this analysis were de-identified and aggregated to the census zone level, as described in  
129 the following.

130 *Epidemiological data.* For the analyses presented here, INAMHI provided a map of  
131 georeferenced dengue cases from Guayaquil in 2012 (n = 4,248), de-identified and aggregated to  
132 census zone polygons to protect the identify of individuals [22]. This map was generated from  
133 individual records of clinically suspected and confirmed cases of dengue fever and DHF

134 (aggregated as total dengue fever) reported to a mandatory disease surveillance system operated  
135 by the Ministry of Health, and included 15.03% of total dengue cases confirmed by the Ministry  
136 of Health in Ecuador for 2012 (n= 16,544) [23]. Dengue cases included in this study were  
137 defined based on clinical diagnosis rather than laboratory confirmed cases due to the low rate of  
138 laboratory confirmation.

139 *Social-ecological risk factors.* We extracted individual and household-level data from the  
140 2010 Ecuadorian National Census [19] to test the hypothesis that social-ecological variables  
141 were associated with the presence and burden of dengue (Table 1). We selected variables that  
142 have been previously described and used in similar epidemiological studies [17]. We created a  
143 normalized housing condition index (0 to 1, where 1 is the worst) by combining three housing  
144 variables: the condition of the roof, condition of the walls, and condition of the floors. Using  
145 individual and household census records, we recoded selected census variables and calculated  
146 parameters as the percent of households or percent of the population per census zone (n = 484).

147 *Climate data.* INAMHI provided rainfall and 2-meter temperature station data at monthly  
148 scale for the period 1981-2012. The long-term means were computed for both variables, and  
149 monthly values for the year 2012 were compared with those climatological values (Fig. 2). A  
150 complementary analysis was performed to understand the behavior of these two variables during  
151 2012, using sea-surface temperature fields from both the Pacific and the Atlantic Oceans  
152 (ERSST version 4, [24], and vertically integrated moisture fluxes computed using the NCEP-  
153 NCAR Reanalysis Project version 2 [25].

154

155 **Statistical Analyses**



156           *Spatial analyses.* We applied Moran's I with inverse distance weighting (ArcMap 10.3.1)  
157 to disease rates derived from epidemiological dengue case and population census data to test the  
158 hypothesis that dengue cases were non-randomly distributed in space. Moran's I is a global  
159 measure of spatial autocorrelation, that provides an index of dispersion from -1 to +1, where -1 is  
160 dispersed, 0 is random, and +1 is clustered. We identified the locations of significant dengue hot  
161 and cold spots using Anselin Local Moran's I with inverse distance weighting (ArcMap 10.3.1).  
162 The Local Moran's I is a local measure of spatial association (LISA) [26] and identifies  
163 significant clusters (hot or cold spots) and outliers (e.g., nonrandom groups of neighborhoods  
164 with above or below the expected dengue prevalence). Previous studies have used global  
165 Moran's I and LISA statistics to test the spatial distribution of dengue transmission [27],  
166 including in Ecuador [6], allowing for comparison between studies.

167           *Social-ecological risk factors.* Individual and household level census data were examined  
168 to identify potential social-ecological variables associated with the presence and burden of  
169 dengue fever, including population density, human demographic characteristics, and housing  
170 condition (Table 1). We hypothesized that the presence or absence of dengue and the severity of  
171 the outbreak were associated with one or more of these factors. Each factor was presented as a  
172 suite of census variables, representing testable variable ensemble hypotheses in a model selection  
173 framework.

174           Two model searches were performed using 'glmulti', an R package for multimodel  
175 selection [28]. The first search was to determine which census factors were influencing the  
176 presence or absence of dengue in Guayaquil, specifying a logistic modeling distribution in a  
177 Generalized Linear Model (GLM) framework (GLM, family=binomial, link=logit). The second  
178 model search examined which census factors were influencing outbreak severity, defined as the

179 localized concentration of dengue, by using dengue case counts per census zone offset by local  
180 population as the dependent variable (GLM, family=negative binomial). Model searches were  
181 run until convergence using glmulti's genetic algorithm (GA) [28]. Generated models were  
182 tested and ranked based on Akaike's Information Criterion (AIC) corrected for small sample size  
183 (AICc).

$$AIC = 2k - 2\ln(L)$$

$$AICc = AIC + \frac{2k(k + 1)}{n - k - 1}$$

184 Where k is the number of parameters in the model, n is the sample size, and L is the maximized  
185 likelihood function for the model. The top ranked model for each search was compared to its  
186 respective global model, which included all proposed variables as model parameters [29].  
187 Parameter estimates and 95% confidence intervals (CI) were calculated for variables in the top  
188 ranked model from each search. Variance inflation factors (VIF) were calculated to assess multi-  
189 collinearity and model dispersion.

190

## 191 **Results**

192 *Spatial dynamics.* Dengue incidence in census zones ranged from 0 cases (n = 88 zones) to  
193 160 cases per 10,000 population (n = 1 zone) (Fig. 4). Dengue cases during the epidemic were  
194 significantly clustered (Moran's I = 0.066, p < 0.05). Findings from the LISA analysis indicated  
195 that there were significant dengue hotspots (n = 30 high-high census zones) in the North Central  
196 and Southern areas of the city, and a smaller number of significant outliers (n = 3 high-low  
197 neighborhood, n = 7 low-high neighborhoods) (p < 0.05, Fig. 4).

198 *Social-ecological risk factors.* The most important risk factors associated with the  
199 presence of cases of dengue fever were poor housing conditions (e.g., poor structural condition

200 of the floor, roof, and walls) and the proportion of households that received remittances. Other  
201 significant risk factors positively associated with the presence of dengue included greater access  
202 to municipal services (sewerage, piped water, garbage collection), fewer households that drink  
203 tap water, and lower proportion of Afro-Ecuadorians in the local population (Table 2). Ten  
204 additional models were found within 2 AICc units of the top model (Supplemental Table 1).

205 Poor housing condition was also the most important risk factor associated with the  
206 severity of localized dengue outbreaks in Guayaquil. Other factors positively associated with the  
207 number of dengue cases per census zone included lower proportion of heads of household with  
208 postsecondary and primary education, lower proportion of Afro-Ecuadorians in the population,  
209 lower proportion of household members under 15 years of age, older age of the heads of  
210 household, greater access to municipal garbage collection, a greater proportion of housing  
211 structures with more than one household, and a greater proportion of families receiving  
212 remittances (Table 3). Twenty-nine additional models were found within 2 AICc units of the top  
213 model (Supplemental Table 2).

214 Results from the VIF analysis showed that 17 of the 23 tested variables had VIF scores  
215 under 10, indicating a fair degree of collinearity among certain predictors within census  
216 categories (e.g. measures of education and household age structure showed some correlation)  
217 Collinear variables were included in the multimodel searches as the main concern with inflated  
218 VIF scores is large error terms, not the coefficient estimates. Collinear variable suites were  
219 shown to be significant in many top models even with conservative model search criteria in  
220 place.

221 *Climate analysis.* The 2012 outbreak occurred toward the end of a weak La Niña event  
222 (2011/2012), with a peak of reported dengue cases around March, just after the precipitation

223 peak of February brought anomalously high rainfall (approximately twice as much as the typical  
224 values for Guayaquil), and concurrent with an increase in temperatures from below-normal to  
225 normal seasonal values (Fig. 2). Although identified as a weak La Niña due to the behavior of  
226 the sea-surface temperature anomalies in the Equatorial Pacific (see Supplemental Figure 1,  
227 “climate”a,c,d), anomalously high moisture fluxes continuously arrived to coastal Ecuador from  
228 the Pacific during January and March (see Supplemental Figure “climate”b,d,e), providing  
229 suitable conditions for the above-normal rainfall amounts observed during the season in  
230 Guayaquil.

231

## 232 **Discussion**

233 Since the 1980s, febrile illnesses transmitted by *Aedes aegypti* and *Aedes albopictus* (dengue  
234 fever, chikungunya, zika fever) have been increasing in incidence and distribution despite  
235 ongoing vector control interventions [2,10,30]. Targeted interventions and new surveillance  
236 strategies are urgently needed to halt the spread of these diseases. The results of this study  
237 highlight the need to differentiate between disease burden and presence when developing risk  
238 maps, providing an important contribution to our understanding of the spatial dynamics of  
239 dengue transmission. This study also provides an important local-level characterization of  
240 transmission dynamics, which are complicated by the non-stationary relationships among  
241 apparent dengue infection, climate, vector, and virus strain dynamics [31–33]; and the  
242 geographic and temporal variation in the social-ecological conditions that influence risk [12–15].

243 In this study, we found that city neighborhoods with certain social-ecological conditions  
244 were more likely to report dengue cases during the 2012 outbreak in Guayaquil. Dengue cases  
245 were clustered in neighborhood-level transmission hotspots near the North Central and Southern

246 portions of the city during the outbreak. The most important risk factors for both presence and  
247 increased burden of dengue outbreak included poor housing condition and the proportion of  
248 households receiving remittances.

249 This study contributes to ongoing efforts by INAMHI and the Ministry of Health of  
250 Ecuador to develop a dengue prediction models, early warning systems, and other climate  
251 services in coastal Ecuador. The results of this study will inform the development of dengue  
252 vulnerability maps and data-driven dengue seasonal forecasts that provide the Ministry of Health  
253 with information to target high-risk regions, allowing for more efficient use of scarce resources  
254 [8].

255

## 256 **Spatial dynamics**

257 During the 2012 outbreak, dengue transmission was focused in hotspots in the North  
258 Central and Southern areas of the city, where land use is a mix of densely populated urban  
259 neighborhoods, industrial lots, and parks. Although they have access to basic services, previous  
260 work suggests that communities in the urban periphery in coastal Ecuador have limited social  
261 organization and interaction with local authorities [5]. Vector control in these areas consists of  
262 larvicidal products distributed by public health workers, but these products must be applied by  
263 individual households. Although there has been no formal evaluation of public mosquito  
264 abatement, health workers have indicated that homeowners do not use provided larvicides (M  
265 Borbor-Cordova, *pers comm.*). It should be noted that these census data do not capture the  
266 quality of the access to services, for example, the frequency of interruptions in the piped water  
267 supply or the frequency of garbage collection, which have a direct effect on mosquito breeding  
268 sites. Many previous studies that used spatial clustering statistics also found evidence of

269 significant clustering of dengue transmission across the urban landscape [12,34–36] A previous  
270 study in Guayaquil, Ecuador, also identified neighborhood-level dengue hot and coldspots, and  
271 found that the location of hotspots shifted over a 5-year period, highlighting the importance of  
272 continued spatial surveillance [6,7]. Longitudinal dengue field studies in Thailand found  
273 evidence of fine-scale spatial and temporal clustering of dengue virus serotypes and transmission  
274 at the school and household levels [37,38]. Focal transmission patterns may be associated with  
275 the limited flight range of the *Ae. aegypti* mosquito. Human movement patterns may also play a  
276 role in determining spatial transmission dynamics in urban environments, as demonstrated by  
277 recent studies of dengue in Peru [39,40]. We suggest that a combination of linked vector flight  
278 range, combined with intra-urban human movement, may lead to moderate hotspot patterns,  
279 while enabling broad spread of dengue.

280 Open access tools are especially important in resource-limited settings, and analysis  
281 packages targeted to dengue are becoming available [41]. Web-based GIS tools have been  
282 developed for global dengue surveillance, such as the CDC's DengueMap, and for local dengue  
283 surveillance research projects [51,52]. National-level dengue GIS initiatives have been  
284 developed in countries such as Mexico, where Ministry of Health practitioners and software  
285 developers jointly designed the software platform. This technology would help public health  
286 decision makers to assess intervention programs and allocate resources more efficiently, and  
287 ultimately providing the foundation for an operational dengue EWS.

288

### 289 **Social-ecological risk factors**

290 We found that poor housing condition was the most important risk factor for dengue  
291 transmission, influencing both the presence of dengue cases and the localized burden of the

292 outbreak. Dengue was more likely to be present in a census zone when housing structures (i.e.  
293 roofs, walls, and floors) were in poor condition, access to paved roads was limited, and the  
294 proportion of houses receiving remittances was high. The risk factors for higher dengue burden  
295 were poor housing condition, proportion of houses receiving remittances, and the number of  
296 dwellings housing more than one family. These results suggest that accessibility of households to  
297 mosquitoes via structural deficiencies, as well as the overall socioeconomic status of  
298 neighborhoods, played a role in the 2012 outbreak (Fig. 6). Although the link between poverty  
299 and dengue transmission is not well characterized, the relationship between poor housing  
300 structure and arbovirus transmission has been well documented [42–45]. Following the economic  
301 crisis in the late 1990s, many Ecuadorians immigrated to the U.S., Spain, and other countries in  
302 Europe for work, resulting in fragmented households and communities. The role of immigration  
303 in urban dengue control and prevention should be explored further [46–48].

304         When modeling for the presence of dengue, all top models included access to core  
305 municipal services such as garbage collection, sewage, access to piped water, and number of  
306 houses drinking tap water as positive predictors of dengue cases (Table 2, Supplement 1).  
307 Municipal garbage collection was also positively correlated with dengue burden in all top models  
308 (Table 3, Supplement 2). Previous studies in smaller communities have observed positive  
309 correlations between lack of services and dengue transmission, as poor sanitation and water  
310 storing habits in urban areas are well-documented for providing habitat for larval *Aedes*  
311 mosquitoes [16,17]. Although municipal services are known to reduce the amount of larval  
312 mosquito habitat, there is some evidence to suggest that heavily urbanized areas, like Guayaquil,  
313 provide ample habitat regardless of service availability [42]. Municipal services in Guayaquil are  
314 spatially heterogeneous, but in general services are more widely available in densely populated

315 areas of the city (Fig. 5). However, it is important to note that access to service does not  
316 necessarily serve as an indicator for quality or frequency of services. Several studies have  
317 identified the interaction between local *Aedes* production and human population density as a key  
318 factor in triggering dengue outbreak events [12,49–51]. The observed counterintuitive findings  
319 may indicate that although access to service should reduce the amount of available habitat for  
320 larval mosquitoes, human population density and quality of service may play a larger role in  
321 urban transmission of dengue.

322         Several demographic characteristics were found to be negatively correlated with dengue  
323 burden, i.e. age structure of households and access to primary and secondary education.  
324 Education, specifically knowledge about dengue, has been shown to influence the prevention  
325 practices of households and elimination of mosquito breeding sites [52]. Previous work in  
326 Machala, Ecuador, also revealed that household-level risk factors and perceptions of dengue  
327 risks vary with social and economic structures between communities [5]. The proportion of Afro-  
328 Ecuadorians per census zone was associated with both lower dengue presence and burden,  
329 indicating the possibility of cultural and racial differences influencing localized transmission, or  
330 disproportionate case reporting.

331         Our findings support previous findings of household risk factors for *Ae. aegypti* rather  
332 than dengue cases in Machala, where it was found that poor housing condition and access to  
333 piped water inside the home were positively associated with the presence of *Ae. aegypti* pupae  
334 [16]. Interestingly, the same risk factors in this study and the prior study emerged despite  
335 differences in rainfall (i.e., the field study was conducted 1 year after the epidemic, during a drier  
336 than average year) and differences in spatial scale (i.e., household versus neighborhood level).  
337 These studies suggest that high risk households could be identified and targeted using a locally



338 adapted rapid survey of housing conditions, similar to the Premise Condition Index, an aggregate  
339 index measuring house condition, patio condition, and patio shade, which has been validated in  
340 other countries [53,54]. In addition, the housing condition index and the combined housing  
341 condition-water access variables that we developed for this study should be explored and  
342 validated as dengue predictors in future studies in this region.

343         The model selection framework used in this study is an effective strategy for exploratory  
344 studies to capture a large number of complex social-ecological processes. In contrast to  
345 traditional frequentist statistical approaches, a model selection approach enabled us to test  
346 multiple hypotheses simultaneously and identify potentially important variables for inclusion,  
347 not limited to significant variables determined by arbitrary p values. Information theoretic or  
348 likelihood modeling approaches allow the modeler, who has *a priori* knowledge of the system, to  
349 make explicit informed decisions about which variables to include in testing in the model, and  
350 explore multiple compatible hypotheses rather than being limited to testing and excluding  
351 individual competing hypotheses. Additionally, the genetic algorithm (GA) in the R package  
352 ‘glmulti’, which explores subsets of all possible models, is a more robust model selection  
353 procedure than stepwise regression techniques, which can lead to biased estimates [28].

354         Guayaquil is a large, heterogeneous urban area, and there may be reporting bias of  
355 dengue cases especially in less populated areas with reduced access to medical care. However,  
356 reporting bias may not be as profound in Guayaquil as in other less-developed coastal cities in  
357 Ecuador. While the number of reported dengue cases was highest in densely populated census  
358 zones, cases were consistently reported throughout most of the city (Figure 3). Previous studies  
359 have shown that there is spatial and temporal variation in dengue hotspots within Guayaquil  
360 [6,7]. With multiple years of data at finer timescales, we could evaluate whether dengue

361 transmission at the beginning of the dengue season or at the beginning of an epidemic is more  
362 likely to begin in neighborhoods with similar characteristics, to assess whether there are  
363 persistent high-risk, hotspot communities that trigger outbreaks. The analyses were limited by a  
364 lack of laboratory confirmation for cases or information about the immune status or  
365 nutritional/health status of the population. Efforts are ongoing to improve dengue diagnostic  
366 infrastructure in the region and to reduce the time lag between epidemiological reporting and  
367 vector control interventions.

### 368 **Climate analysis**

369         Rainfall excess in 2012 produced moisture-saturated soils, formation of ponds of  
370 different sizes, water accumulation in a variety of container, and other suitable conditions for  
371 vector proliferation. The transition to higher temperatures between February (rainfall maximum)  
372 and March is hypothesized here to have also contributed to the outbreak; for an analysis of  
373 similar conditions for a dengue outbreak in Machala [15]. We note that the fact that it was not a  
374 strong La Niña positively contributed to the occurrence of the dengue epidemic that year, as that  
375 case tends to be associated with a higher number of rainfall extreme events in the region, and  
376 thus more runoff and a harder environment for mosquito breeding.

377

### 378 **Conclusions**

379         Our findings highlight the importance of incorporating spatial and social-ecological  
380 information with georeferenced and clinically validated epidemiological data in a dengue  
381 surveillance system. We found spatial clustering of dengue cases within Guayaquil, and  
382 demonstrated that the presence and burden of dengue varied between census zones with social-  
383 ecological factors.

384 **Abbreviations**

385 AIC, Akaike's Information Criterion; AICc, Akaike's Information Criterion corrected for small  
386 sample size; CDC, Centers for Disease Control; CI, confidence intervals; DENV, dengue virus;  
387 DHF, dengue hemorrhagic fever; EWS, early warning systems; GA, genetic algorithm; GIS,  
388 geographic information system; GLM, Generalized Linear Model; INAMHI, National Institute  
389 of Meteorology and Hydrology; LISA, local indicators of spatial association; NCEP-NCAR,  
390 National Center for Environmental Protection – National Center for Atmospheric Research; VIF,  
391 variance inflation factors

392

393 **Declarations**

394 **Ethics Approval:** No formal ethical review was required as the data provided from INAMHI  
395 used in this analysis were de-identified and aggregated to the census zone level as described in  
396 the methodology.

397 **Data Availability:** The data that support the findings of this study were made available through  
398 the Ecuadorian Ministry of Health and INAMHI, but restrictions apply to the availability of these  
399 data which were used in partnership for the current study. As such these data are not publicly  
400 available. Data are however available from the authors upon reasonable request and with  
401 permission of INAHMI.

402 **Competing interests:** The authors declare that they have no competing interests.

403 **Funding:** CAL, SJR, AMS were supported on NSF DEB EEID 1518681, and SJR and AMS  
404 were also supported on NSF DEB RAPID 1641145. This work was additionally funded by the  
405 National Secretary of Higher Education, Science, Technology and Innovation of Ecuador

406 (SENESCYT), grant to INAMHI for the project “Surveillance and climate modeling to predict  
407 dengue in urban centers (Guayaquil, Huaquillas, Portovelo, Machala)”.

408

409 **Authors’ contributions:** AMSI, AGM, MJB, and RM conceived of the investigation. KR  
410 compiled the data used in analyses. AMSI, AGM, CAL, and SJR conducted analyses and drafted  
411 the manuscript. All co-authors assisted with interpretation of the data, providing feedback for  
412 this manuscript. All authors read and approved the final manuscript.

413

#### 414 **Acknowledgements**

415 Many thanks to colleagues at the Ministry of Health and the National Institute of Meteorology  
416 and Hydrology for supporting ongoing climate–health initiatives in Ecuador. AGM used  
417 computational resources from the Observatorio Latinoamericano de Eventos Extraordinarios  
418 ([www.ole2.org](http://www.ole2.org)) and Centro de Modelado Científico (CMC), Universidad del Zulia. Authors are  
419 thankful to Dr. Lakshmi Krishnamurthy (Princeton University) for her insightful comments on  
420 an earlier version of this paper.

## References

1. Zambrano H, Waggoner JJ, Almeida C, Rivera L, Benjamin JQ, Pinsky BA. Zika Virus and Chikungunya Virus CoInfections: A Series of Three Cases from a Single Center in Ecuador. *Am. J. Trop. Med. Hyg.* [Internet]. 2016 [cited 2016 Sep 16]; Available from: <http://www.ajtmh.org/cgi/doi/10.4269/ajtmh.16-0323>
2. Dick OB, Martín JLS, Montoya RH, Diego J del, Zambrano B, Dayan GH. The History of Dengue Outbreaks in the Americas. *Am. J. Trop. Med. Hyg.* 2012;87:584–93.
3. Pan American Health Organization, World Health Organization. Zika suspected and confirmed cases reported by countries and territories in the Americas. Cumulative cases, 2015 - 2016. [Internet]. PAN/WHO, Washington, D.C.; 2016. Available from: [http://www.paho.org/hq/index.php?option=com\\_content&view=article&id=12390&Itemid=42090&lang=en](http://www.paho.org/hq/index.php?option=com_content&view=article&id=12390&Itemid=42090&lang=en)
4. Muñoz ÁG, Thomson MC, Goddard L, Aldighieri S. Analyzing climate variations at multiple timescales can guide Zika virus response measures. *GigaScience* [Internet]. 2016 [cited 2016 Oct 17];5. Available from: <http://gigascience.biomedcentral.com/articles/10.1186/s13742-016-0146-1>
5. Stewart Ibarra AM, Luzadis VA, Borbor Cordova MJ, Silva M, Ordoñez T, Beltrán Ayala E, et al. A social-ecological analysis of community perceptions of dengue fever and *Aedes aegypti* in Machala, Ecuador. *BMC Public Health* [Internet]. 2014 [cited 2016 Aug 16];14. Available from: <http://bmcpublichealth.biomedcentral.com/articles/10.1186/1471-2458-14-1135>
6. Castillo KC, Körbl B, Stewart A, Gonzalez JF, Ponce F. Application of spatial analysis to the examination of dengue fever in Guayaquil, Ecuador. *Procedia Environ. Sci.* 2011;7:188–93.
7. Castillo, Katty C. Zeit-Raumanalyse des Einflusses von Umwelt und sozialen Faktoren auf den

Ausbruch von Denguefieber im Zeitraum 2005-2009 in Guayaquil-Ecuador [Dissertation].

Heinrich-Heine-Universität Düsseldorf; 2011.

8. Kuhn, Katrin, Campbell-Lendrum, Diarmid, Haines, Andy, Cox, Jonathan. Using climate to predict infectious disease epidemics [Internet]. World Health Organization; 2005. Available from: <http://www.who.int/globalchange/publications/infectdiseases.pdf?ua=1>

9. Thomson MC, García Herrera R, Beniston M. Seasonal forecasts, climatic change and human health: health and climate [Internet]. Dordrecht; London: Springer; 2008 [cited 2016 Aug 2]. Available from: <http://site.ebrary.com/id/11029199>

10. WHO | Global Strategy for dengue prevention and control, 2012–2020 [Internet]. WHO. [cited 2014 May 5]. Available from: <http://www.who.int/denguecontrol/9789241504034/en/>

11. Banaitiene N, editor. Risk Management - Current Issues and Challenges [Internet]. InTech; 2012 [cited 2016 Oct 17]. Available from: <http://www.intechopen.com/books/risk-management-current-issues-and-challenges>

12. Almeida AS de, Medronho R de A, Valencia LIO. Spatial analysis of dengue and the socioeconomic context of the city of Rio de Janeiro (Southeastern Brazil). *Rev. Saúde Pública.* 2009;43:666–73.

13. de Mattos Almeida MC, Caiaffa WT, Assunção RM, Proietti FA. Spatial Vulnerability to Dengue in a Brazilian Urban Area During a 7-Year Surveillance. *J. Urban Health.* 2007;84:334–45.

14. Mondini A, Bronzoni RV de M, Nunes SHP, Chiaravalloti Neto F, Massad E, Alonso WJ, et al. Spatio-Temporal Tracking and Phylodynamics of an Urban Dengue 3 Outbreak in São Paulo, Brazil. Gubler D, editor. *PLoS Negl. Trop. Dis.* 2009;3:e448.

15. Teixeira M da G, Barreto ML, Costa M da CN, Ferreira LDA, Vasconcelos PFC, Cairncross

S. Dynamics of dengue virus circulation: a silent epidemic in a complex urban area. *Trop. Med. Int. Health* 2002;7:757–62.

16. Stewart Ibarra AM, Ryan SJ, Beltrán E, Mejía R, Silva M, Muñoz Á. Dengue Vector Dynamics (*Aedes aegypti*) Influenced by Climate and Social Factors in Ecuador: Implications for Targeted Control. Mores CN, editor. *PLoS ONE*. 2013;8:e78263.

17. Stewart-Ibarra AM, Muñoz ÁG, Ryan SJ, Ayala EB, Borbor-Cordova MJ, Finkelstein JL, et al. Spatiotemporal clustering, climate periodicity, and social-ecological risk factors for dengue during an outbreak in Machala, Ecuador, in 2010. *BMC Infect. Dis.* [Internet]. 2014 [cited 2016 Aug 3];14. Available from: <http://bmcinfectdis.biomedcentral.com/articles/10.1186/s12879-014-0610-4>

18. Alava, A., Mosquera, C., Vargas, W., Real, J. Dengue en el Ecuador 1989-2002. *Rev. Ecuat. Hig. Med. Trop.* 2005;42:11–34.

19. INEC. Censo de Población y Vivienda. Instituto Nacional de Estadística y Censos; 2010.

20. Real, J., Mosquera, C. Detección del Virus Dengue en el Ecuador. Una Vision Epidemiologica. Período 1988 - 2012. Instituto Nacional de Higiene y Medicina Tropical; 2012.

21. Muñoz, Á.G., Stewart-Ibarra, A.M., Ruiz-Carrascal, D. Desarrollo de Modelos de Pronóstico Experimental: Análisis Socio Ecológico de Riesgo a Dengue y Análisis Estadístico de Patrones Climáticos, Entomológicos y Epidemiológicos en Modelos de Dengue. Technical Report, CLIDEN Project. INAMHI-SENESCYT, Quito, Ecuador; 2013.

22. Hartter J, Ryan SJ, MacKenzie CA, Parker JN, Strasser CA. Spatially Explicit Data: Stewardship and Ethical Challenges in Science. *PLoS Biol.* 2013;11:e1001634.

23. Ministerio de Salud Pública. Boletín epidemiológico de la situación del Dengue en el Ecuador. 2013 [cited 2016 Aug 3]; Available from: <http://www.salud.gob.ec/boletin->

epidemiologico-de-la-situacion-del-dengue-en-el-ecuador-no-46-07-de-enero-de-2013/

24. Huang B, Banzon VF, Freeman E, Lawrimore J, Liu W, Peterson TC, et al. Extended Reconstructed Sea Surface Temperature Version 4 (ERSST.v4). Part I: Upgrades and Intercomparisons. *J. Clim.* 2015;28:911–30.
25. Kanamitsu M, Ebisuzaki W, Woollen J, Yang S-K, Hnilo JJ, Fiorino M, et al. NCEP–DOE AMIP-II Reanalysis (R-2). *Bull. Am. Meteorol. Soc.* 2002;83:1631–43.
26. Anselin L. Local Indicators of Spatial Association-LISA. *Geogr. Anal.* 2010;27:93–115.
27. Oliveira MA de, Ribeiro H, Castillo-Salgado C. Geospatial analysis applied to epidemiological studies of dengue: a systematic review. *Rev. Bras. Epidemiol. Braz. J. Epidemiol.* 2013;16:907–17.
28. Calcagno V, Mazancourt C de. glmulti: An R Package for Easy Automated Model Selection with (Generalized) Linear Models. *J. Stat. Softw.* [Internet]. 2010 [cited 2016 Aug 3];34. Available from: <http://www.jstatsoft.org/v34/i12/>
29. Burnham KP, Anderson DR, Burnham KP. Model selection and multimodel inference: a practical information-theoretic approach. 2nd ed. New York: Springer; 2002.
30. San Martín JL, Brathwaite O, Zambrano B, Solórzano JO, Bouckennooghe A, Dayan GH, et al. The Epidemiology of Dengue in the Americas Over the Last Three Decades: A Worrisome Reality. *Am. J. Trop. Med. Hyg.* 2010;82:128–35.
31. Reiner RC, Stoddard ST, Forshey BM, King AA, Ellis AM, Lloyd AL, et al. Time-varying, serotype-specific force of infection of dengue virus. *Proc. Natl. Acad. Sci.* 2014;111:E2694–702.
32. Cazelles B, Chavez M, McMichael AJ, Hales S. Nonstationary Influence of El Niño on the Synchronous Dengue Epidemics in Thailand. Pascual M, editor. *PLoS Med.* 2005;2:e106.
33. Cummings DAT, Irizarry RA, Huang NE, Endy TP, Nisalak A, Ungchusak K, et al.



- Travelling waves in the occurrence of dengue haemorrhagic fever in Thailand. *Nature*. 2004;427:344–7.
34. Galli B, Chiaravalloti Neto F. Temporal-spatial risk model to identify areas at high-risk for occurrence of dengue fever. *Rev. Saúde Pública*. 2008;42:656–63.
35. Vazquez-Prokopec GM, Kitron U, Montgomery B, Horne P, Ritchie SA. Quantifying the Spatial Dimension of Dengue Virus Epidemic Spread within a Tropical Urban Environment. Gubler DJ, editor. *PLoS Negl. Trop. Dis*. 2010;4:e920.
36. Hu W, Clements A, Williams G, Tong S. Spatial analysis of notified dengue fever infections. *Epidemiol. Infect*. 2011;139:391–9.
37. Endy TP, Nisalak A, Chunsuttiwat S, Libraty DH, Green S, Rothman AL, et al. Spatial and Temporal Circulation of Dengue Virus Serotypes: A Prospective Study of Primary School Children in Kamphaeng Phet, Thailand. *Am. J. Epidemiol*. 2002;156:52–9.
38. Yoon I-K, Getis A, Aldstadt J, Rothman AL, Tannitisupawong D, Koenraadt CJM, et al. Fine Scale Spatiotemporal Clustering of Dengue Virus Transmission in Children and *Aedes aegypti* in Rural Thai Villages. *PLoS Negl Trop Dis*. 2012;6:e1730.
39. Stoddard ST, Morrison AC, Vazquez-Prokopec GM, Paz Soldan V, Kochel TJ, Kitron U, et al. The Role of Human Movement in the Transmission of Vector-Borne Pathogens. Kittayapong P, editor. *PLoS Negl. Trop. Dis*. 2009;3:e481.
40. Vazquez-Prokopec GM, Stoddard ST, Paz-Soldan V, Morrison AC, Elder JP, Kochel TJ, et al. Usefulness of commercially available GPS data-loggers for tracking human movement and exposure to dengue virus. *Int. J. Health Geogr*. 2009;8:68.
41. Delmelle EM, Zhu H, Tang W, Casas I. A web-based geospatial toolkit for the monitoring of dengue fever. *Appl. Geogr*. 2014;52:144–52.

42. Mulligan K, Dixon J, Joanna Sinn C-L, Elliott SJ. Is dengue a disease of poverty? A systematic review. *Pathog. Glob. Health.* 2015;109:10–8.
43. Van Benthem BHB, Vanwambeke SO, Khantikul N, Burghoorn-Maas C, Panart K, Oskam L, et al. Spatial patterns of and risk factors for seropositivity for dengue infection. *Am. J. Trop. Med. Hyg.* 2005;72:201–8.
44. Bradley J, Rehman AM, Schwabe C, Vargas D, Monti F, Ela C, et al. Reduced Prevalence of Malaria Infection in Children Living in Houses with Window Screening or Closed Eaves on Bioko Island, Equatorial Guinea. Chowell G, editor. *PLoS ONE.* 2013;8:e80626.
45. Hiscox A, Khammanithong P, Kaul S, Sananikhom P, Luthi R, Hill N, et al. Risk Factors for Mosquito House Entry in the Lao PDR. Snounou G, editor. *PLoS ONE.* 2013;8:e62769.
46. Jokisch B, Pribilsky J. The Panic to Leave: Economic Crisis and the “New Emigration” from Ecuador. *Int. Migr.* 2002;40:75–102.
47. Bertoli S, Fernandez-Huertas Moraga J, Ortega F. Immigration Policies and the Ecuadorian Exodus. *World Bank Econ. Rev.* 2011;25:57–76.
48. Bertoli S, Marchetta F. Migration, Remittances and Poverty in Ecuador. *J. Dev. Stud.* 2014;50:1067–89.
49. Schmidt W-P, Suzuki M, Dinh Thiem V, White RG, Tsuzuki A, Yoshida L-M, et al. Population Density, Water Supply, and the Risk of Dengue Fever in Vietnam: Cohort Study and Spatial Analysis. Farrar J, editor. *PLoS Med.* 2011;8:e1001082.
50. Padmanabha H, Durham D, Correa F, Diuk-Wasser M, Galvani A. The Interactive Roles of *Aedes aegypti* Super-Production and Human Density in Dengue Transmission. Weaver SC, editor. *PLoS Negl. Trop. Dis.* 2012;6:e1799.
51. Rodrigues M, Marques G, Serpa L, Arduino M, Voltolini J, Barbosa G, et al. Density of

*Aedes aegypti* and *Aedes albopictus* and its association with number of residents and meteorological variables in the home environment of dengue endemic area, São Paulo, Brazil.

Parasit. Vectors. 2015;8:115.

52. Van Benthem BHB, Khantikul N, Panart K, Kessels PJ, Somboon P, Oskam L. Knowledge and use of prevention measures related to dengue in northern Thailand. Trop. Med. Int. Health TM IH. 2002;7:993–1000.

53. Andrighetti, Maria Teresa Macoris, Galvini, Karen Cristina, Macoris, Maria D.L.D.G. Evaluation of premise condition index in the context of *Aedes aegypti* control in Marília, São Paulo, Brazil. Dengue Bull. 2009;33:167–75.

54. Tun-Lin W, Kay BH, Barnes A. The Premise Condition Index: a tool for streamlining surveys of *Aedes aegypti*. Am. J. Trop. Med. Hyg. 1995;53:591–4.

422 **Figures and Tables**

423

424 **Figure 1.** The study site, Guayaquil, is located within Guayas province in coastal Ecuador.

425

426 **Figure 2.** Climate trends in Guayaquil, Ecuador. The bold line shows the average temperature  
427 and rainfall from 2000 – 2012 in comparison with monthly average temperature for 2012 (dashed  
428 line). The red bars show monthly totals of confirmed dengue cases from 2012.

429

430 **Figure 3.** Total number of clinically diagnosed cases of dengue fever in Guayaquil, Ecuador  
431 (2000 – 2012) (A). Cases during the 2012 outbreak were reported throughout the city's census  
432 zones (B).

433

434 **Figure 4.** LISA analysis for the 2012 Guayaquil outbreak. Cases of dengue were significantly  
435 clustered in the North Central and Southern areas of the city.

436

437 **Figure 5.** Population density (people per km<sup>2</sup>) of census zones in Guayaquil (A) shown against  
438 the proportion of homes lacking municipal garbage collection (B), lacking municipal sewage (C),  
439 and lacking piped water (D). Although dengue cases were reported in both densely and sparsely  
440 populated census zones, dengue hot spots were more associated with higher density zones (Fig.  
441 3), and the proportion of homes that lack basic municipal services tends to be higher in zones  
442 with lower population density. This may account for the counterintuitive model estimates  
443 associated with lack of these services (Tables 2 & 3).

444 **Figure 6.** Conceptual diagrams highlighting the census variable suites that significantly affected  
445 dengue presence (A) and dengue burden (B) in Guayaquil, Ecuador during the 2012 outbreak.

446

447 **Table 1.** Socio-ecological parameters tested in logistic regression and negative binomial model  
448 searches to respectively predict presence of dengue and severity of outbreak.

449

450 **Table 2.** Top logistic regression model used in determining which social-ecological factors are  
451 important to dengue presence.

452

453 **Table 3.** Top negative binomial model used in determining which social-ecological factors are  
454 important to dengue burden.

455

456 **Supplemental Figure 1.** Sea-surface temperature anomalies (contours ( $^{\circ}\text{C}$ )) and surface-level  
457 winds (vectors (m/s)) (panels a, c, e); vertically-integrated moisture flux anomalies (g/kg m/s)  
458 over Ecuador (panels b,d,f), during January, February and March 2012 (top, middle and bottom  
459 rows, respectively). Red dot indicates location of Guayaquil.

460

461 **Supplemental Table 1.** All logistic regression models for presence or absence of dengue cases  $\leq$   
462 2 AICc units.

463

464 **Supplemental Table 2.** All negative binomial regression models for burden of dengue cases  $\leq$  2  
465 AICc units.

466

467 **Figure 1.**

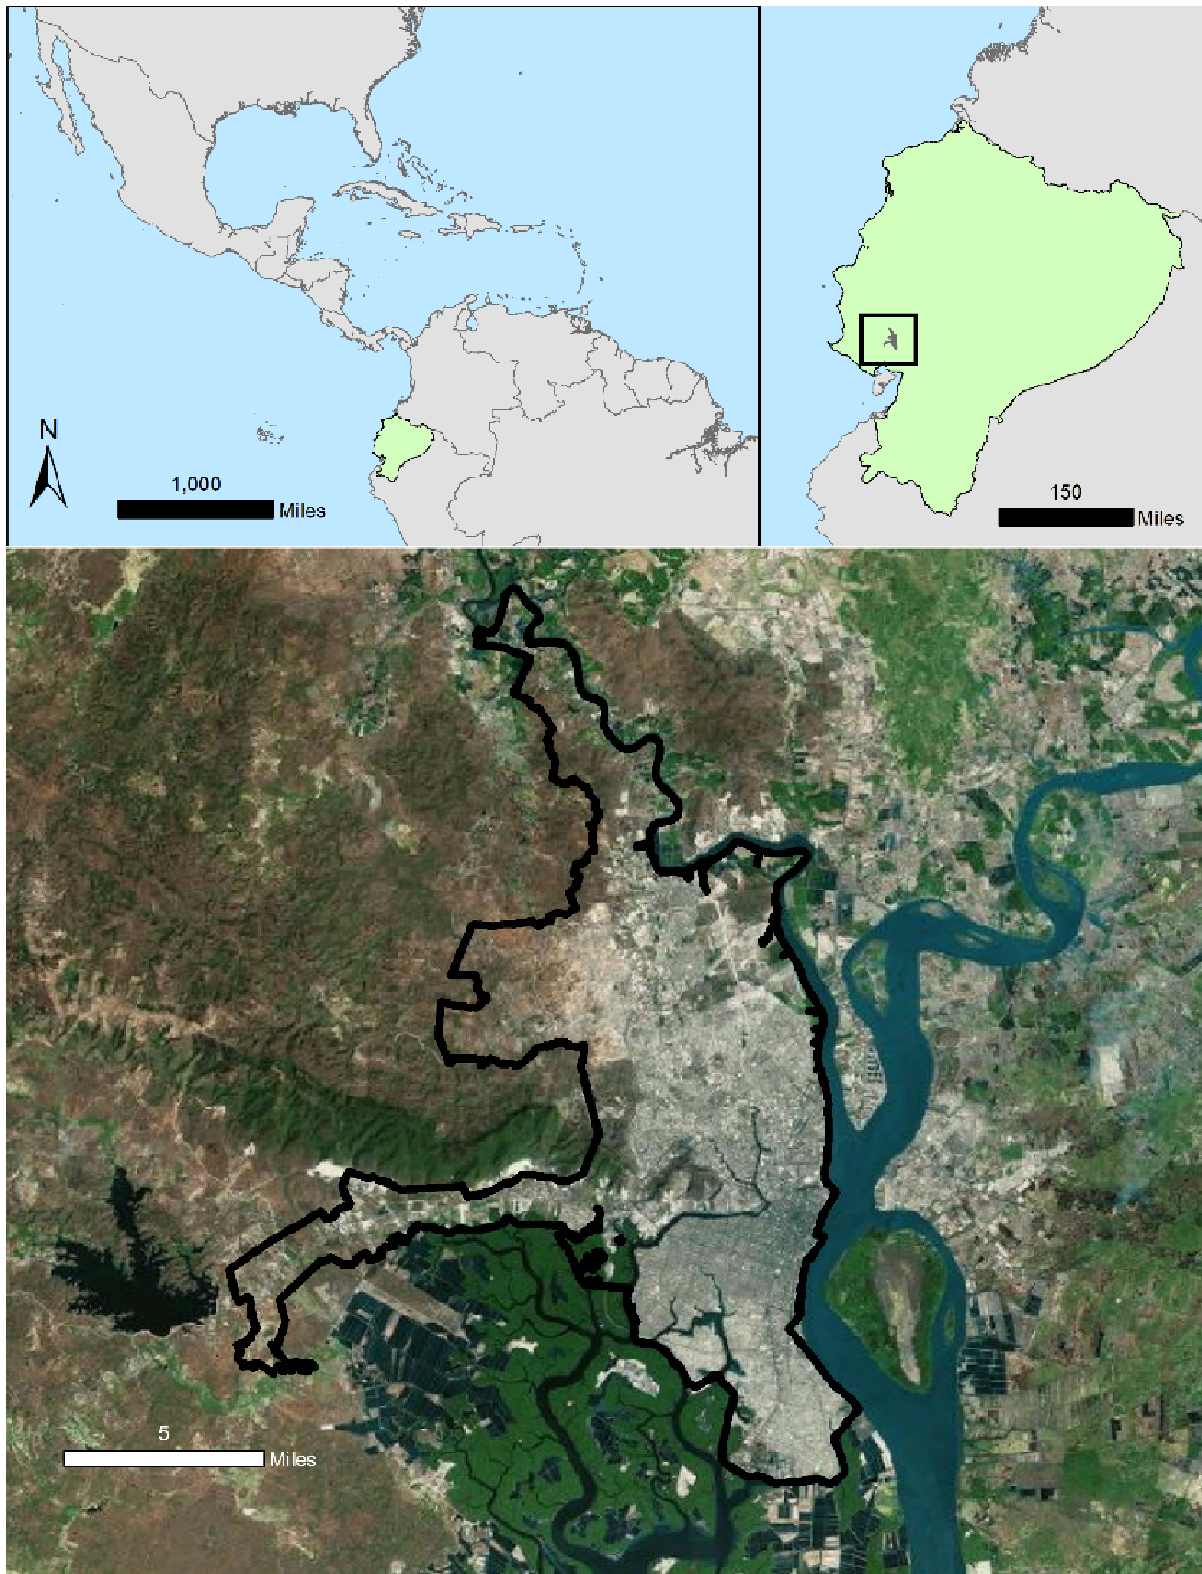

468

469 **Figure 2.**

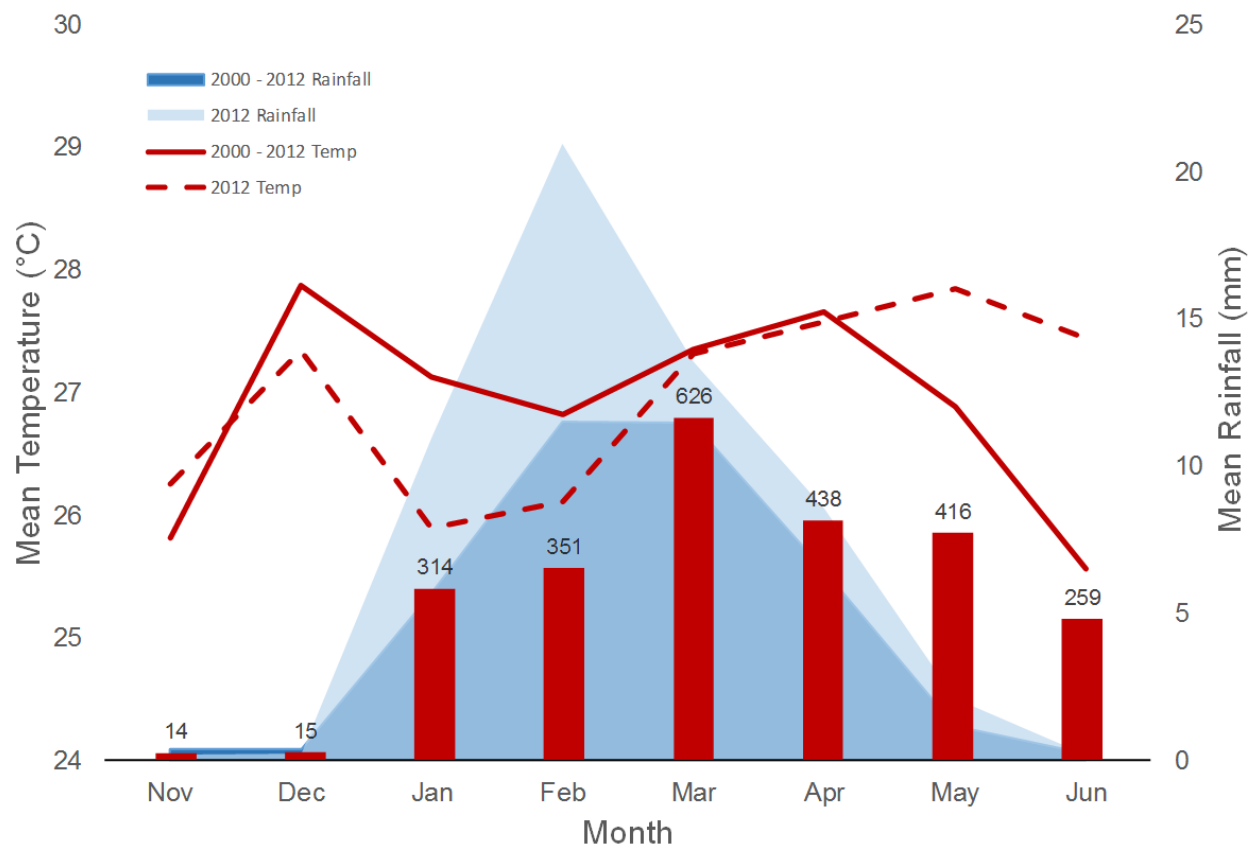

470

471

472 **Figure 3.**

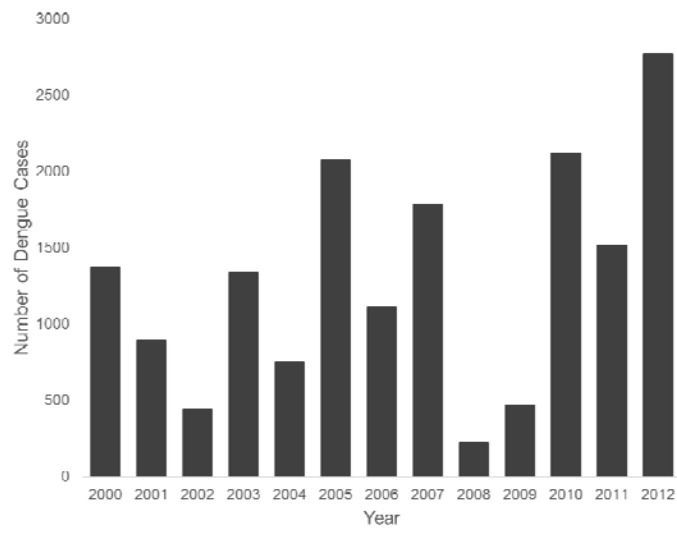

473

A.

Reported Dengue Cases

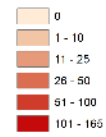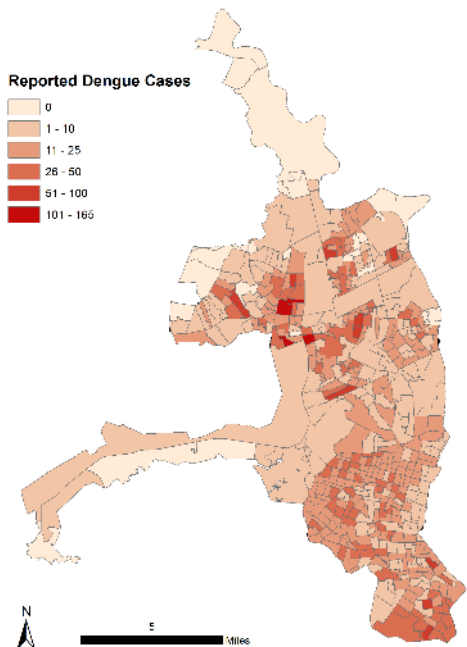

B.



474 **Figure 4.**

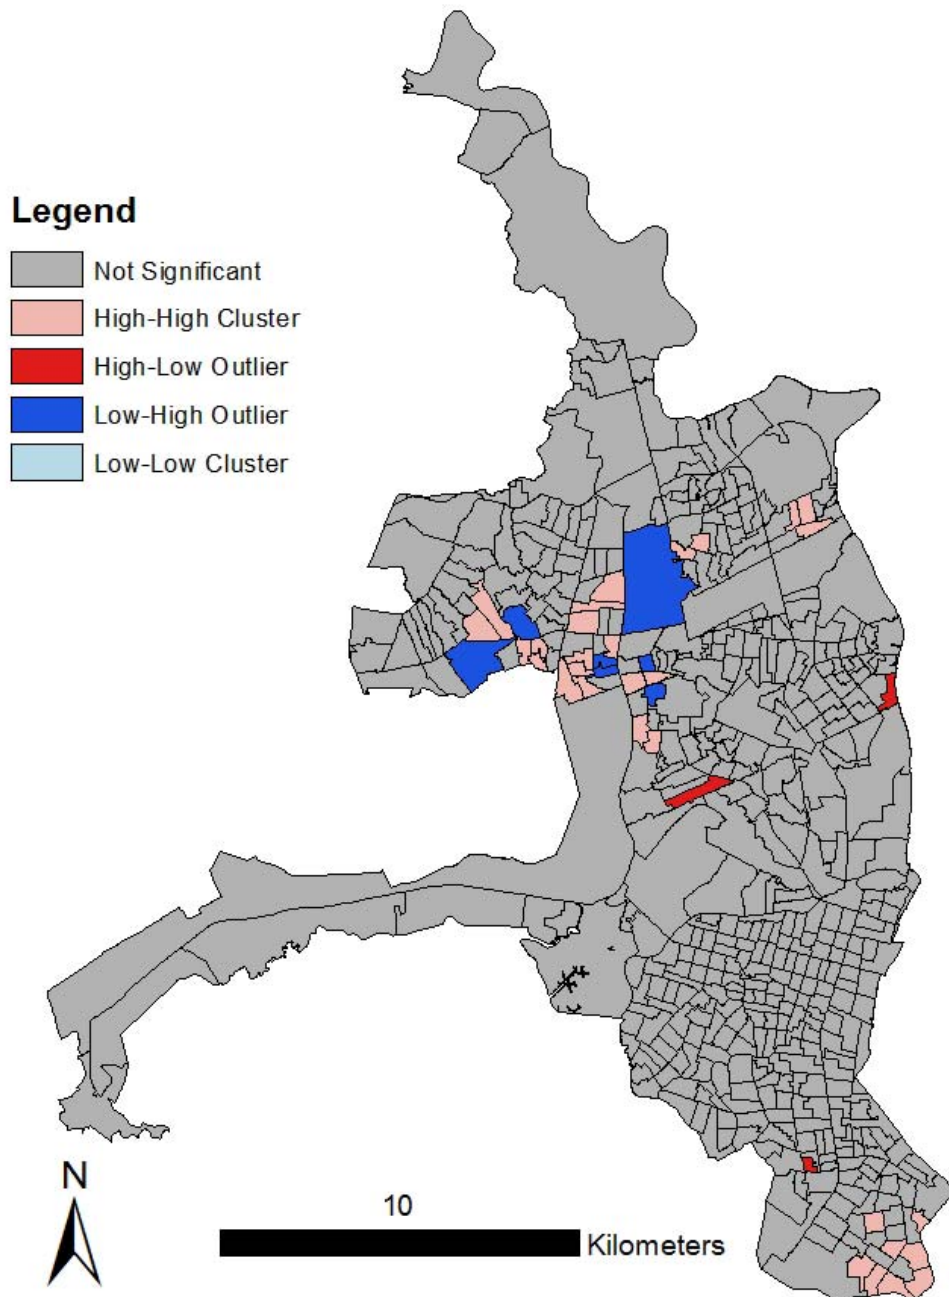

475

476

477 **Figure 5.**

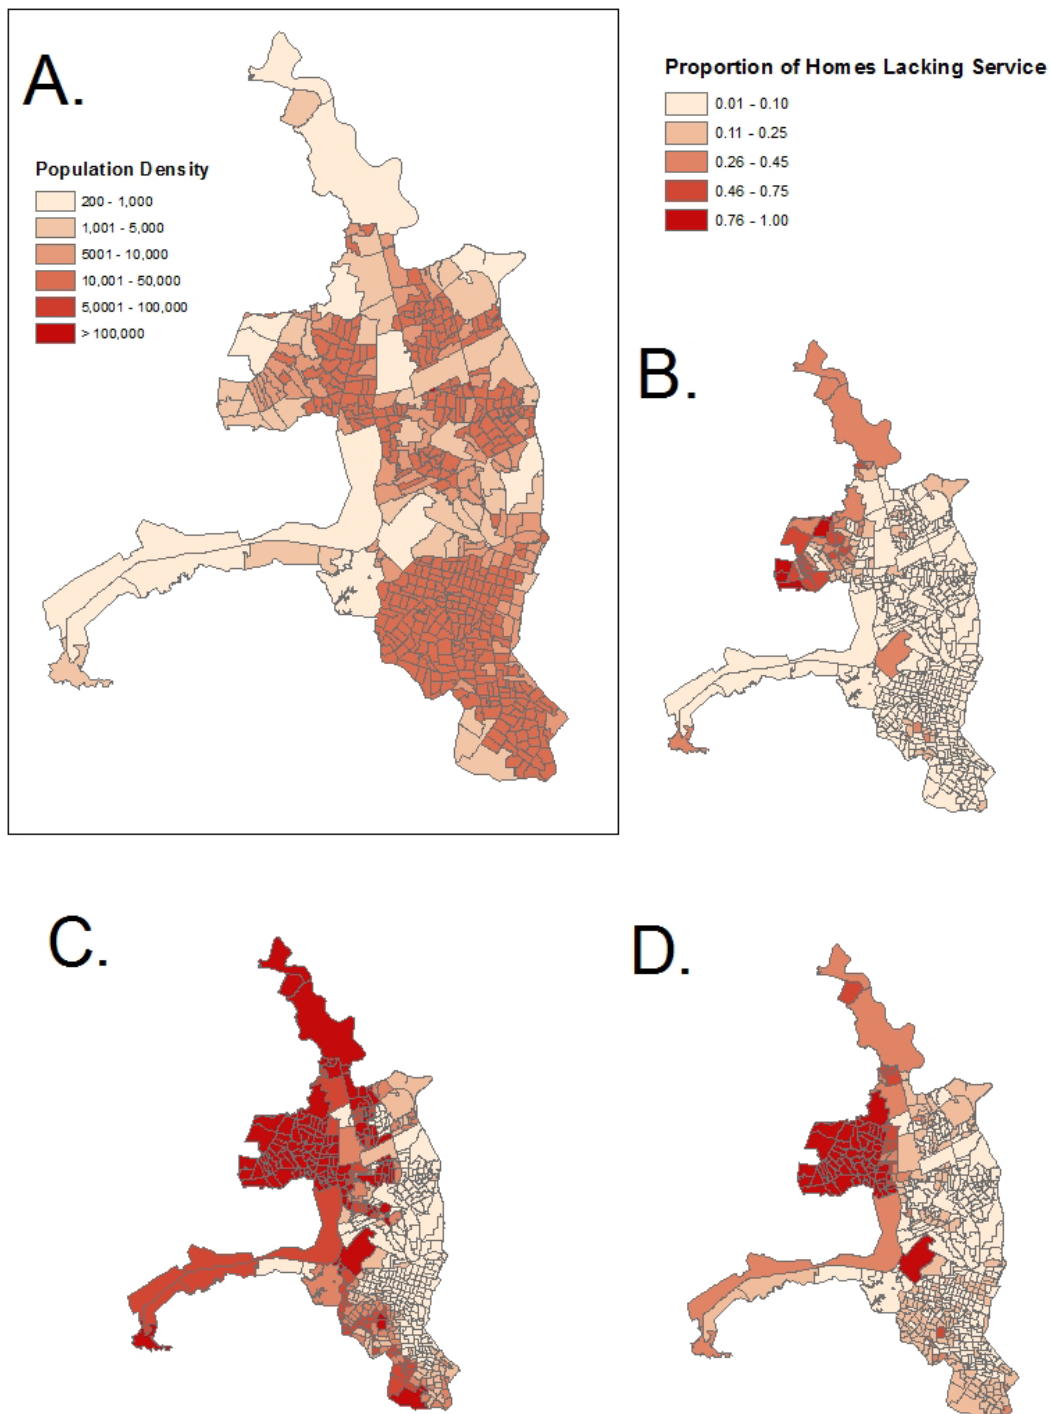

478

479

480 **Figure 6.**

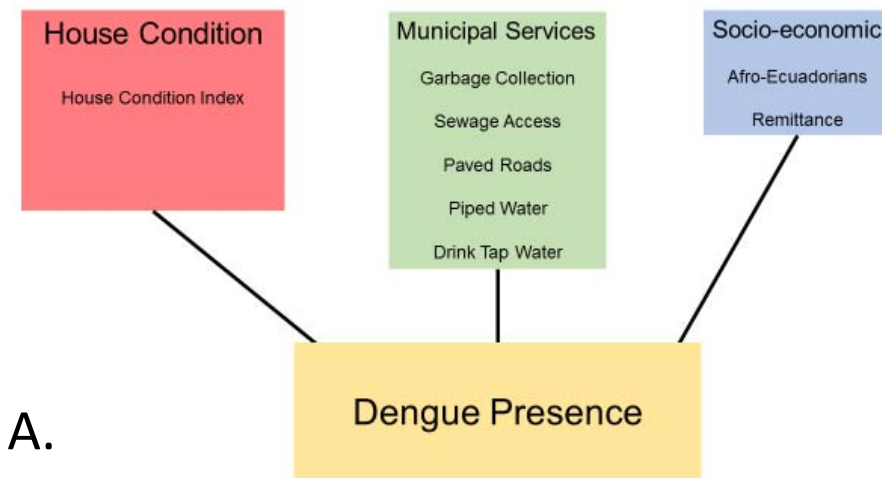

481

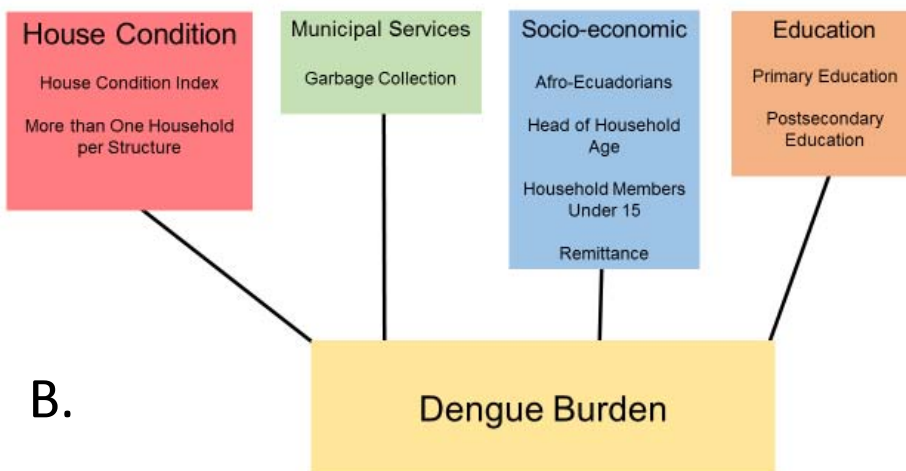

482

483

484 **Table 1.** Socio-ecological parameters tested in logistic regression and negative binomial model  
 485 searches to respectively predict presence of dengue and severity of outbreak.

| <b>Parameter</b>                                                  | <b>Mean</b> | <b>SD</b> |
|-------------------------------------------------------------------|-------------|-----------|
| <b>Housing conditions</b>                                         |             |           |
| House condition index (HCI),<br>0 to 1, where 1 is poor condition | 0.27        | 0.12      |
| More than four people per bedroom                                 | 16.78 %     | 0.08      |
| People per household                                              | 3.88        | 0.34      |
| Municipal garbage collection                                      | 93.06 %     | 0.15      |
| People in household drink tap water                               | 76.85 %     | 0.09      |
| Piped water inside home                                           | 77.03 %     | 0.31      |
| Municipal sewage                                                  | 62.52 %     | 0.39      |
| Access to paved roads                                             | 80.06 %     | 0.25      |
| More than one household per structure                             | 1.90 %      | 0.01      |
| Unoccupied households                                             | 16.08 %     | 0.56      |
| Rental homes                                                      | 1.55%       | 0.17      |
| <b>Demographics</b>                                               |             |           |
| Receive remittances                                               | 8.85 %      | 0.04      |
| People emigrate for work                                          | 1.88 %      | 0.01      |
| Mean age of the head of the household (years)                     | 45.69       | 4.54      |
| Mean household age (years)                                        | 29.36       | 4.29      |
| Proportion of household under 15 years of age                     | 28.34 %     | 0.06      |
| Proportion of household under 5 years of age                      | 9.31 %      | 0.03      |
| Head of the household has primary education or less               | 30.94 %     | 0.15      |
| Head of household has secondary education                         | 31.73 %     | 0.07      |
| Head of household has post-secondary education                    | 25.77 %     | 0.21      |
| Afro-Ecuadorian                                                   | 10.13 %     | 0.07      |
| Head of the household is unemployed                               | 26.84 %     | 0.06      |
| Head of the household is a woman                                  | 33.29 %     | 0.04      |

486

487 **Table 2.** Top logistic regression model

| <b>Model</b>                   | <b>Estimate</b> | <b>95% CI</b>  | <b>SE</b> | <b>AICc</b> | <b>P-Value</b> |
|--------------------------------|-----------------|----------------|-----------|-------------|----------------|
| Intercept                      | 3.84            | 0.54 – 7.25    | 1.71      | 369.85      | 0.03           |
| House condition                | 24.55           | 17.62 – 32.11  | 3.69      |             | < 0.001        |
| Proportion of Afro-Ecuadorians | -9.69           | -15.72 – -3.76 | 3.04      |             | 0.001          |
| Municipal garbage collection   | 4.70            | 2.27– 7.37     | 1.29      |             | < 0.001        |
| Piped water                    | 3.50            | 1.38 –5.72     | 1.10      |             | 0.002          |
| Municipal sewage               | 2.04            | 0.44 – 3.62    | 0.81      |             | 0.012          |
| Access by paved roads          | -3.36           | -6.36 – -0.54  | 1.48      |             | 0.023          |
| Drink tap water                | -10.74          | -16.53 – -5.28 | 2.86      |             | < 0.001        |
| Remittance                     | 23.20           | 10.83 – 36.15  | 6.44      |             | < 0.001        |

488

489

490 **Table 3.** Top negative binomial model.

| <b>Model</b>                             | <b>Estimate</b> | <b>95% CI</b>  | <b>SE</b> | <b>AICc</b> | <b>P-Value</b> |
|------------------------------------------|-----------------|----------------|-----------|-------------|----------------|
| Intercept                                | 1.04            | -4.09 – 6.25   | 2.54      | 2920.67     | 0.682          |
| House condition                          | 10.95           | 6.77 – 15.13   | 2.09      |             | < 0.001        |
| Postsecondary education                  | -2.53           | -4.72 – -0.34  | 1.07      |             | 0.018          |
| Primary education                        | -5.11           | -8.52 – -1.71  | 1.62      |             | 0.002          |
| Proportion of Afro-Ecuadorians           | -4.23           | -6.43 – -1.94  | 1.25      |             | < 0.001        |
| Proportion of household members under 15 | -9.02           | -15.58 – -2.50 | 3.46      |             | 0.009          |
| Head of household age                    | -0.12           | -0.19 – -0.05  | 0.03      |             | < 0.001        |
| Municipal garbage collection             | 2.82            | 1.77 – 3.87    | 0.61      |             | < 0.001        |
| More than 1 household per structure      | 7.57            | -4.66 – 20.03  | 6.26      |             | 0.227          |
| Remittance                               | 4.76            | -1.27 – 10.87  | 3.07      |             | 0.121          |

491

492 **Supplementary Table 1**

493

| Model                                                                                                    | AICc   | Wt   |
|----------------------------------------------------------------------------------------------------------|--------|------|
| x ~ 1 + afro + housecond + no_garbage + no_piped + no_sewage + no_pave + remit + drinktap                | 369.85 | 0.11 |
| x ~ 1 + afro + unocc + housecond + no_garbage + no_piped + no_sewage + no_pave + remit + drinktap        | 370.97 | 0.06 |
| x ~ 1 + afro + pplperhh + housecond + no_garbage + no_piped + no_sewage + no_pave + remit + drinktap     | 371.07 | 0.06 |
| x ~ 1 + afro + fourpplbedrm + housecond + no_garbage + no_piped + no_sewage + no_pave + remit + drinktap | 371.10 | 0.06 |
| x ~ 1 + afro + housecond + no_garbage + no_piped + no_sewage + no_pave + gt1hh + remit + drinktap        | 371.13 | 0.06 |
| x ~ 1 + afro + housecond + no_garbage + no_piped + no_sewage + no_pave + remit + drinktap + rental       | 371.39 | 0.05 |
| x ~ 1 + prim + afro + housecond + no_garbage + no_piped + no_sewage + no_pave + remit + drinktap         | 371.61 | 0.04 |
| x ~ 1 + afro + housecond + no_garbage + no_piped + no_sewage + no_pave + remit + emigr + drinktap        | 371.68 | 0.04 |
| x ~ 1 + afro + womhead + housecond + no_garbage + no_piped + no_sewage + no_pave + remit + drinktap      | 371.70 | 0.04 |
| x ~ 1 + afro + unemploy + housecond + no_garbage + no_piped + no_sewage + no_pave + remit + drinktap     | 371.73 | 0.04 |
| x ~ 1 + sec + afro + housecond + no_garbage + no_piped + no_sewage + no_pave + remit + drinktap          | 371.82 | 0.04 |

494

495

496  
497

**Supplementary Table 2**

| <b>Model</b>                                                                                                                                 | <b>AICc</b> | <b>Wt</b> |
|----------------------------------------------------------------------------------------------------------------------------------------------|-------------|-----------|
| x ~ 1 + postsec + prim + afro + under15 + headhh_age + housecond + no_garbage + gt1hh + remit                                                | 2920.67     | 0.03      |
| x ~ 1 + postsec + prim + afro + under15 + headhh_age + housecond + no_garbage + no_sewage + gt1hh + remit                                    | 2920.71     | 0.03      |
| x ~ 1 + postsec + prim + afro + under15 + headhh_age + housecond + no_garbage + no_sewage + gt1hh + remit + drinktap + rental                | 2920.76     | 0.03      |
| x ~ 1 + postsec + prim + afro + under15 + headhh_age + housecond + no_garbage + gt1hh + remit + drinktap + rental                            | 2921.05     | 0.03      |
| x ~ 1 + postsec + prim + afro + under15 + headhh_age + womhead + housecond + no_garbage + no_sewage + gt1hh + remit                          | 2921.16     | 0.03      |
| x ~ 1 + postsec + prim + afro + under15 + headhh_age + housecond + no_garbage + no_sewage + gt1hh + remit + rental                           | 2921.18     | 0.03      |
| x ~ 1 + postsec + prim + afro + under15 + headhh_age + womhead + housecond + no_garbage + gt1hh + remit                                      | 2921.20     | 0.03      |
| x ~ 1 + postsec + prim + afro + under15 + headhh_age + fourpplbedrm + housecond + no_garbage + no_sewage + gt1hh + remit                     | 2921.20     | 0.03      |
| x ~ 1 + postsec + prim + afro + under15 + headhh_age + housecond + no_garbage + no_piped + no_sewage + gt1hh + remit + rental                | 2921.48     | 0.02      |
| x ~ 1 + postsec + prim + afro + under15 + headhh_age + housecond + no_garbage + gt1hh + remit + drinktap                                     | 2921.52     | 0.02      |
| x ~ 1 + postsec + prim + afro + under15 + hh_age + headhh_age + housecond + no_garbage + no_sewage + gt1hh + remit + drinktap + rental       | 2921.60     | 0.02      |
| x ~ 1 + postsec + prim + afro + under15 + headhh_age + fourpplbedrm + housecond + no_garbage + gt1hh + remit                                 | 2921.65     | 0.02      |
| x ~ 1 + postsec + prim + afro + under15 + hh_age + headhh_age + housecond + no_garbage + gt1hh + remit                                       | 2921.66     | 0.02      |
| x ~ 1 + postsec + prim + afro + under15 + headhh_age + womhead + housecond + no_garbage + no_sewage + gt1hh + remit + drinktap + rental      | 2921.77     | 0.02      |
| x ~ 1 + postsec + prim + afro + under15 + headhh_age + housecond + no_garbage + gt1hh + remit + rental                                       | 2921.97     | 0.02      |
| x ~ 1 + postsec + prim + afro + under15 + headhh_age + fourpplbedrm + housecond + no_garbage + no_sewage + gt1hh + remit + drinktap + rental | 2921.97     | 0.02      |
| x ~ 1 + postsec + prim + afro + under15 + headhh_age + housecond + no_garbage + no_piped + no_sewage + gt1hh + remit + drinktap + rental     | 2922.00     | 0.02      |
| x ~ 1 + postsec + prim + afro + under15 + under1 + headhh_age + housecond + no_garbage + no_sewage + gt1hh + remit + drinktap + rental       | 2922.05     | 0.02      |
| x ~ 1 + postsec + prim + afro + under15 + headhh_age + housecond + no_garbage + no_sewage + gt1hh + remit + drinktap                         | 2922.05     | 0.02      |
| x ~ 1 + postsec + prim + afro + under15 + under1 + headhh_age + housecond + no_garbage + gt1hh + remit                                       | 2922.09     | 0.02      |
| x ~ 1 + postsec + sec + prim + afro + under15 + headhh_age + housecond + no_garbage + gt1hh + remit                                          | 2922.11     | 0.02      |
| x ~ 1 + postsec + prim + afro + under15 + under1 + headhh_age + housecond + no_garbage + no_sewage + gt1hh + remit                           | 2922.13     | 0.02      |



|                                                                                                                                          |         |      |
|------------------------------------------------------------------------------------------------------------------------------------------|---------|------|
| x ~ 1 + postsec + sec + prim + afro + under15 + headhh_age + housecond + no_garbage + no_sewage + gt1hh + remit                          | 2922.24 | 0.02 |
| x ~ 1 + postsec + prim + afro + under15 + headhh_age + housecond + no_garbage + no_piped + gt1hh + remit                                 | 2922.26 | 0.02 |
| x ~ 1 + postsec + prim + afro + under15 + headhh_age + pplperhh + housecond + no_garbage + no_sewage + gt1hh + remit + drinktap + rental | 2922.44 | 0.01 |
| x ~ 1 + postsec + prim + afro + under15 + headhh_age + housecond + no_garbage + no_pave + gt1hh + remit                                  | 2922.47 | 0.01 |
| x ~ 1 + postsec + prim + afro + under15 + headhh_age + housecond + no_garbage + no_sewage + gt1hh                                        | 2922.47 | 0.01 |
| x ~ 1 + postsec + prim + afro + under15 + headhh_age + fourpplbedrm + housecond + no_garbage + gt1hh + remit + drinktap + rental         | 2922.53 | 0.01 |
| x ~ 1 + postsec + prim + afro + under15 + headhh_age + womhead + housecond + no_garbage + no_sewage + gt1hh + remit + drinktap           | 2922.56 | 0.01 |
| x ~ 1 + postsec + prim + afro + under15 + headhh_age + pplperhh + housecond + no_garbage + gt1hh + remit                                 | 2922.63 | 0.01 |

498
